# Supplementary material for: A nitrile solvent structure induced stable solid electrolyte interphase for wide-temperature lithium-ion batteries
Source: Royal Society of Chemistry journal article supplement (doi:10.1039/d4sc03890h), 2024-01-01
Supplement: d4sc03890h1.pdf [file d4sc03890h1.pdf]

## Supporting Information

### A nitrile solvent structure induced stable solid electrolyte interphase for wide-temperature lithium-ion batteries

*Zhongming Wang<sup>1</sup>, Zhiyuan He<sup>1</sup>, Zhongsheng Wang<sup>1</sup>, Jixu Yang<sup>1</sup>, Kecheng Long<sup>1</sup>, Zhibin Wu<sup>1</sup>, Gang Zhou<sup>3</sup>, Lin Mei<sup>1\*</sup>, Libao Chen<sup>1,2\*</sup>*

E-mail: meilin@csu.edu.cn, lbchen@csu.edu.cn

1 State Key Laboratory of Powder Metallurgy, Central South University, Changsha, 410083, P. R. China.

2 National Energy Metal Resources and New Materials Key Laboratory, Central South University, Changsha, 410083, P. R. China.

3 School of Materials Science and Engineering, Dongguan University of Technology, Dongguan, 523000, P. R. China.

**Keywords:** lithium-ion battery; electrolyte; nitrile solvent; electrode interface; wide temperature

**Table S1.** Physicochemical properties of different solvents

| Solvent name<br>/Physical property | Ethylene Carbonate<br>(EC) | Acetonitrile<br>(AN) | Butyronitrile (<br>BN) | Valeronitrile<br>(VN) |
|------------------------------------|----------------------------|----------------------|------------------------|-----------------------|
| melting point/°C                   | 39                         | -45                  | -112                   | -96.2                 |
| boiling point/°C                   | 248                        | 82                   | 117                    | 141.3                 |
| density (20°C) g/cm <sup>3</sup>   | 1.41                       | 0.786                | 0.794                  | 0.795                 |
| Viscosity/mPa·S                    | 1.9(40°C)                  | 0.325 (30°C)         | 0.515 (30°C)           | 0.779 (25°C)          |
| dielectric constant<br>c/v·m       | 89                         | 38.8                 | 20.7                   | 21                    |



**Figure S1.** The viscosity of different electrolytes at room temperature.



**Figure S2.** The Li<sup>+</sup> diffusion coefficients of different electrolytes at room temperature.



**Figure S3.** The image records of various electrolytes after being statically placed for over 10 hours under the conditions of 25°C and -50°C, respectively



**Figure S4.** The solvent coordination number of EC and VN electrolyte group



**Figure S5.** The capacity and voltage curves of various electrolytes during 3 cycles with 0.1C, (a) EC group, (b) AN group, (C) BN group, (d) VN group



**Figure S6.** The  $dQ/dV$  curves of various electrolytes during 3 cycles with 0.1C, (a) EC group, (b) AN group, (c) BN group, (d) VN group



Figure S7. Charging curves of different electrolytes with 3 C at room temperature.



**Figure S8.** (a) The electrochemical impedance spectroscopy (EIS) of each electrolyte, (b) Ohmic internal resistance values of different groups



**Figure S9.** Scanning Electron Microscopy (SEM) images of graphite electrode after 1 cycle(a-d) and 10 cycles(e-h) of cycling



**Figure S10.** TEM image of the anode of AN electrolyte after 1 cycle



**Figure S11.** N1s spectrum of anode XPS: (a) after capacity grading and (b) after 10 cycles



**Figure S12.** Scanning Electron Microscopy (SEM) images of NCM523 electrode after 1 cycle
